# Supplementary material for: MET1-Dependent DNA Methylation Represses Light Signaling and Influences Plant Regeneration in Arabidopsis
Source: PubMed Central journal article supplement — Mol Cells. 2021 Oct 20;44(10):746–57. doi: 10.14348/molcells.2021.0160 (PMC8560584; doi:10.14348/molcells.2021.0160), 2021-10-20
Supplement: molce-44-10-746-supple1.pdf [file molce-44-10-746-supple1.pdf]

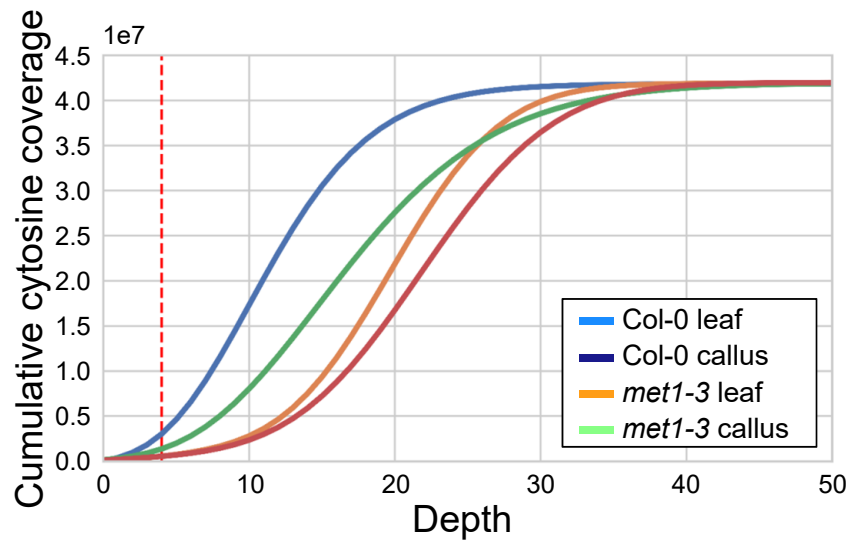

Supplementary Fig. S1. Cumulative cytosine coverage in leaf and callus tissues of *met1-3* and wild type. Red vertical dashed line indicates minimum depth threshold.

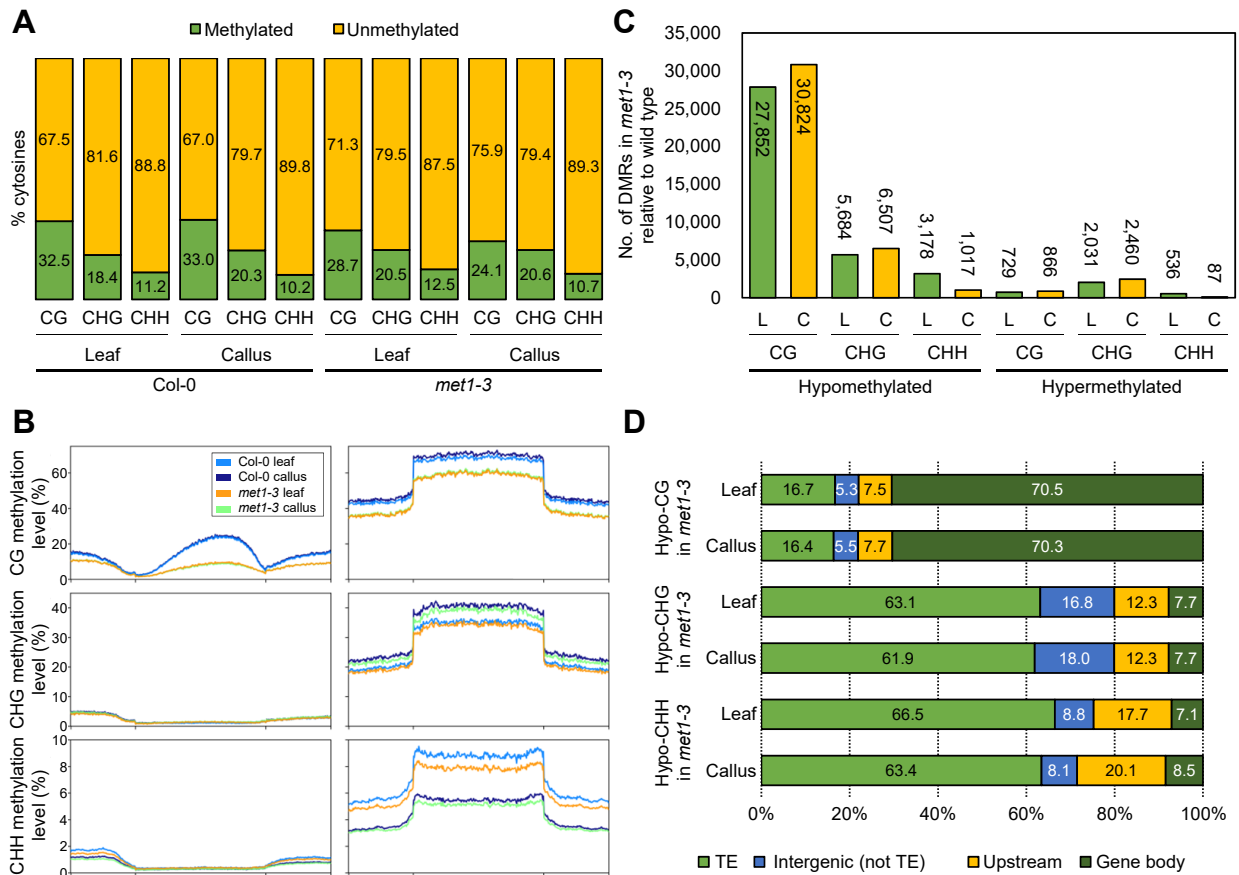

**Supplementary Fig. S2. Genome-wide DNA methylation patterns in *met1-3* and wild type.** (A) Fractions of methylated and unmethylated cytosines in *met1-3* and wild type. (B) Average level of DNA methylation over genic and TE regions. The flanking 1-kb regions were analyzed. TSS, transcription start site; TTS, transcription termination site. (C) Distribution of differentially methylated regions (DMRs). The number of DMRs in *met1-3* relative to wild type was analyzed in each sequence context. L, leaf; C, callus. (D) Distribution of DMRs in genic (upstream 1 kb and gene body), transposable element (TE) and intergenic regions.

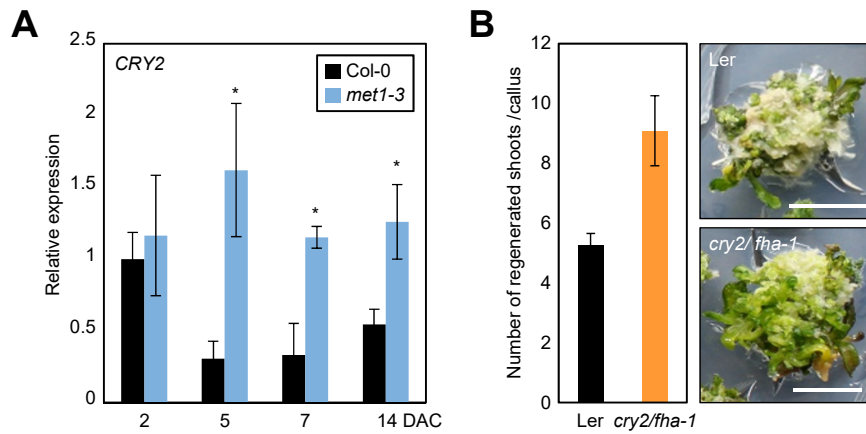

**Supplementary Fig. S3. Role of CRY2 in plant regeneration.** (A) Transcript accumulation of *CRY2* in *met1-3* during callus formation. Transcript accumulation was analyzed by RT-qPCR. Three independent biological replicates were averaged, and statistical significance of the measurements was analyzed by a Student's *t*-test ( $*P < 0.05$ ). (B) Shoot regeneration capacity of *cry2/fha-1* mutant. Callus preincubated for 7 days on CIM were transferred to SIM. The number of regenerated shoots from calli was measured ( $n > 20$ ) at 3 weeks after incubation on SIM. Three independent biological replicates were averaged. Bars indicate the SEM. Scale bars = 10 mm.
